# Supplementary material for: The effect of rare earth (RE3+) ionic radii on transparent lanthanide-tellurite glass-ceramics: correlation between ‘hole-formalism’ and crystallization
Source: Royal Society of Chemistry journal article supplement (doi:10.1039/d3ma00036b), 2023-01-01
Supplement: d3ma00036b1.pdf [file d3ma00036b1.pdf]

## **Supporting Information**

### **Effect of Rare Earth (RE<sup>3+</sup>) Ionic Radii on Transparent Lanthanide Tellurite Glass-Ceramics: Correlation between ‘Hole-Formalism’ and Crystallization**

Pritha Patra,<sup>1,2</sup> K. Jayanthi,<sup>3</sup> Margit Fabian,<sup>4</sup> Shweta R. Keshri,<sup>5</sup> Sandip Bysakh,<sup>6</sup> Kaushik Biswas,<sup>1,2</sup> Nitya Nand Gosvami,<sup>5</sup> N. M. Anoop Krishnan,<sup>7</sup> Amarnath R. Allu,<sup>2,8</sup> Kalyandurg Annapurna<sup>1,2,\*</sup>

<sup>1</sup> Specialty Glass Division, CSIR-Central Glass and Ceramic Research Institute, 196, Raja S. C. Mullick Road, Kolkata 700 032, India.

<sup>2</sup>Academy of Scientific and Innovative Research (AcSIR), CSIR- Human Resource Development Centre, (CSIR-HRDC) Campus, Postal Staff College Area, Sector 19, Kamla Nehru Nagar, Ghaziabad, Uttar Pradesh- 201 002, India.

<sup>3</sup>ORNL, USA

<sup>4</sup>Centre for Energy Research, 1121, Budapest, Konkoly-Thege st. 29-33, Hungary.

<sup>5</sup>Department of Materials Science and Engineering, Indian Institute of Technology Delhi, Hauz Khas, New Delhi 10016, India

<sup>6</sup>Advanced Material Characterization unit, Material Characterization and Instrumentation Division, CSIR-Central Glass and Ceramic Research Institute, 196 Raja S C Mullick Road, 700032, Kolkata, India.

<sup>7</sup>Department of Civil Engineering, Indian Institute of Technology Delhi, Hauz Khas, New Delhi 10016, India

<sup>8</sup>Energy Materials and Devices Division, CSIR-Central Glass and Ceramic Research Institute, 196 Raja S C Mullick Road, 700032, Kolkata, India.

---

\*Corresponding authors:

E-mail address: [annapurnak@cgcric.res.in](mailto:annapurnak@cgcric.res.in) (K. Annapurna)

telephone: +91-33-24733496

Fax: +91-33-24730957

## Supplementary Information (SI):

### 1. X-Ray diffraction of RE doped (Ce to Dy) glasses:

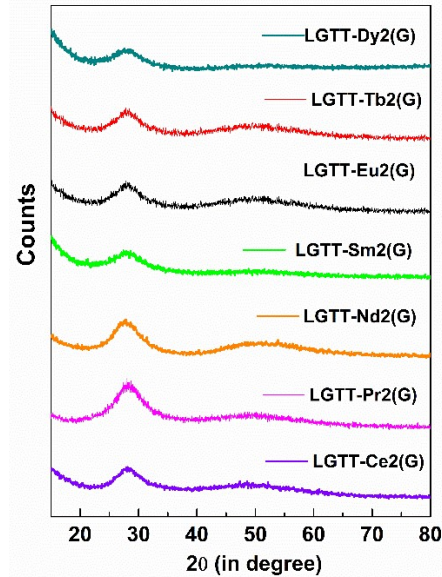

*Fig. S1* X-ray diffraction of all the RE (Ce, Pr, Nd, Sm, Eu, Tb, Dy) doped glasses.

### 2. RMC simulation procedure:

For the RMC starting model a random atomic configuration was built up with a simulation box containing 10 000 atoms with density data  $0.0636 \text{ atoms}\text{\AA}^{-3}$  and half-box values  $r_{max}=26.98 \text{ \AA}$  for TTLG glass. In the RMC simulation procedure constraints have been used for the minimum interatomic distances between atom pairs (cut-off distances) to avoid unreasonable atom contacts. During the RMC simulations were used coordination constraints for Te, La and Gd surroundings. The starting cut-off distances have been take from previous studies.<sup>37,38,39,40,41</sup> Several RMC runs have been performed by slightly modifying the cut-off distances in the way, that the results of each run have been carefully checked to obtain reliable data for each  $g_{ij}(r)$  and coordination number

distributions. For all the samples about 30-35 RMC configurations were obtained with more than 1 400 000 accepted moves of atoms.

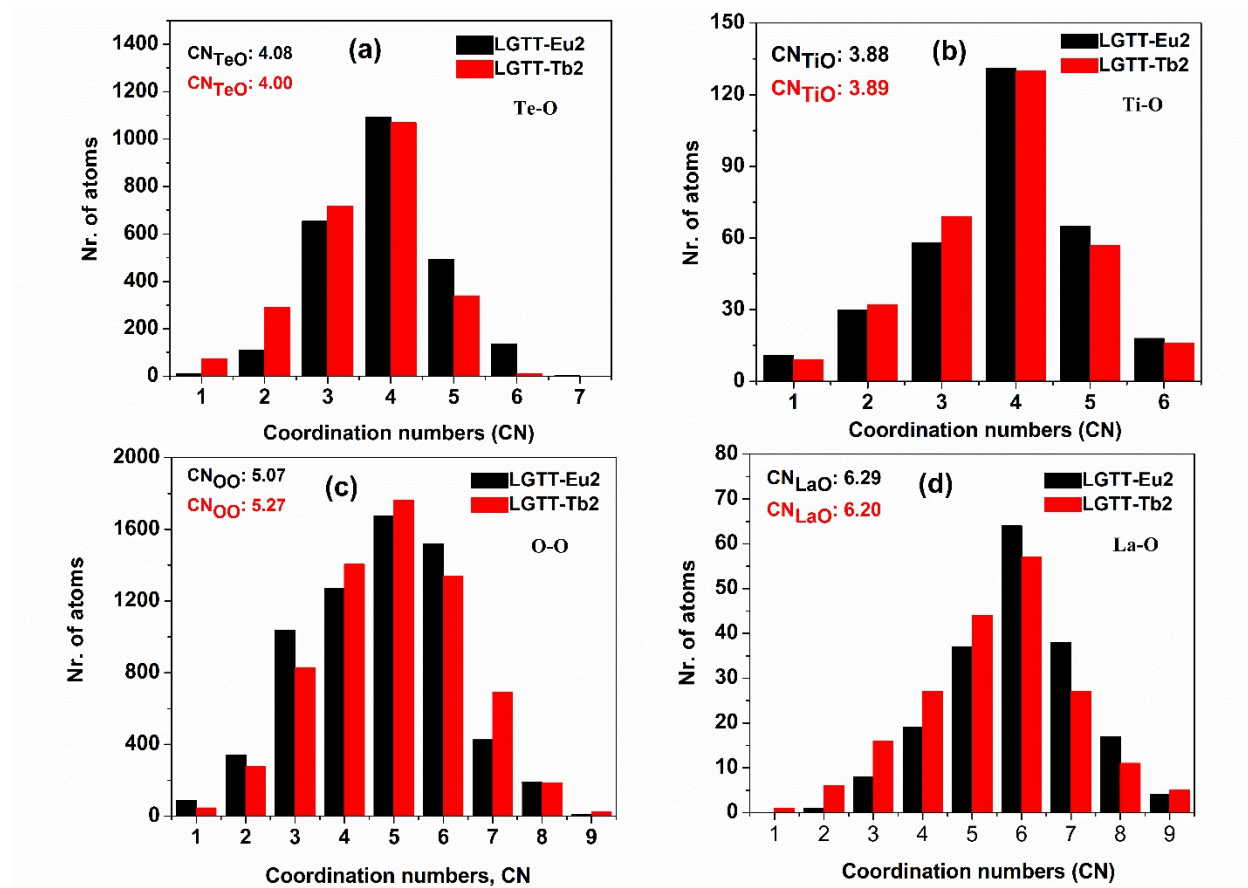

**Fig. S2** Co-ordination numbers (CN) for (a) Te-O, (b) Ti-O, (c) O-O and (d) La-O of LGTT-Eu2 and LGTT-Tb2 glass.

### 3. Heat capacity measurement:

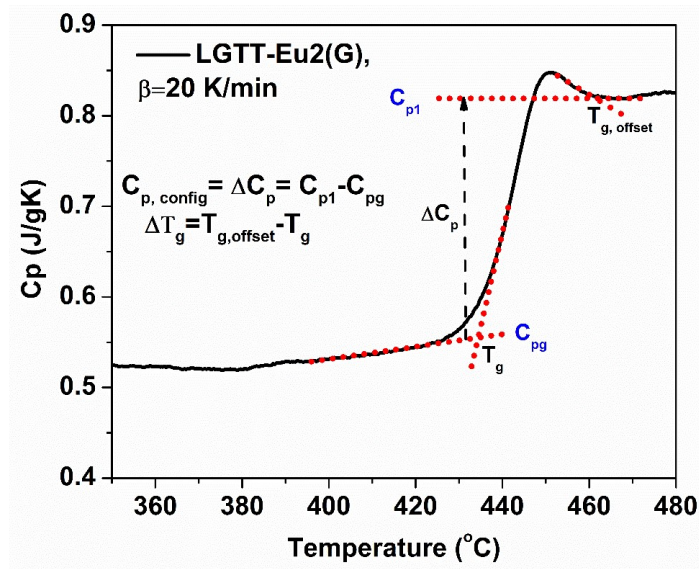

**Fig. S3** The method to identify and calculate  $T_g$ ,  $T_{g,offset}$ ,  $\Delta T_g$  and  $\Delta C_p$  values from  $C_p$  curve.

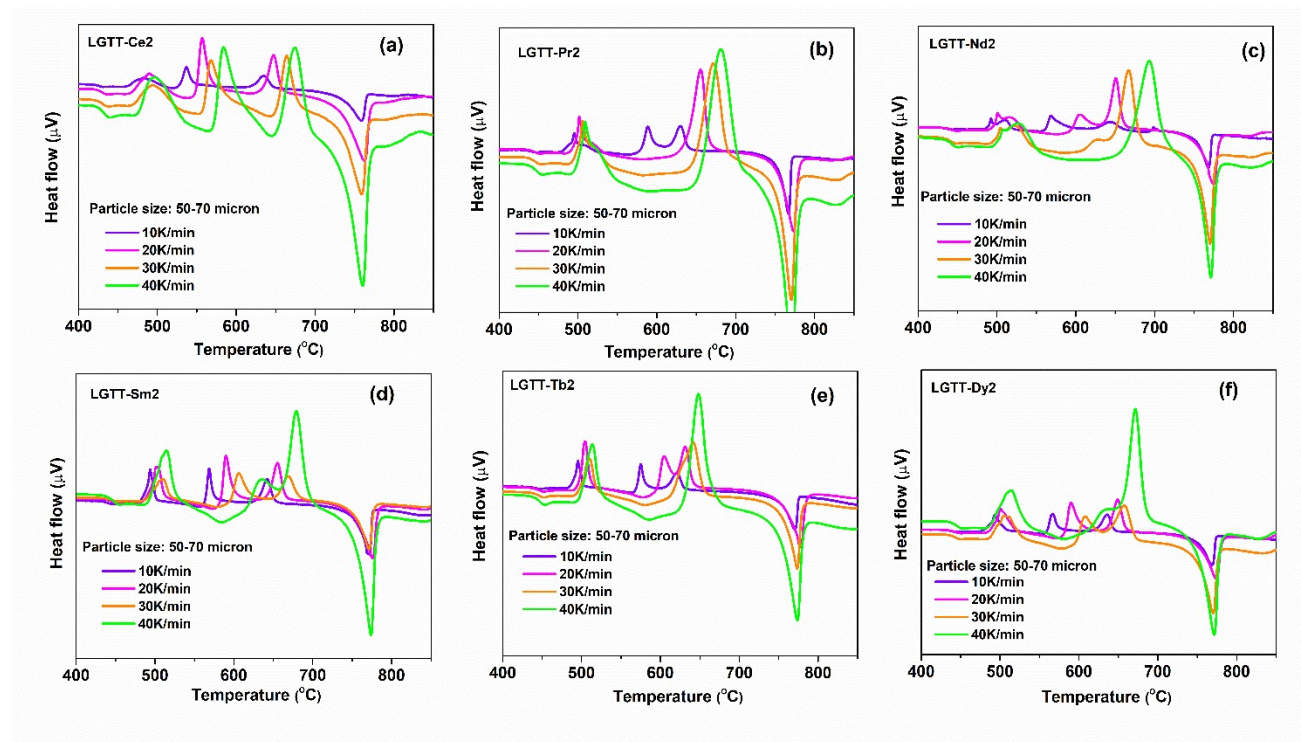

**Fig. S4** DSC thermograms for all the RE doped glasses with four non-isothermal heating rate ( $\beta$ ) of 10, 20, 30 and 40 K/min.

#### 4. Thermal properties of different RE doped (Ce to Dy) glasses:

All the thermal characteristic temperatures like glass transition temperature ( $T_g$ ), crystallization onset temperature ( $T_{x1}$ ), first crystallization peak temperature ( $T_{p1}$ ), melting point ( $T_m$ ) have been tabulated in Table S1: glass thermal stability ( $\Delta T = T_{x1} - T_g$ ) is calculated using respective  $T_g$ ,  $T_{x1}$ ,  $T_{p1}$ ,  $T_m$  values, given in Table S1. For crystallization kinetics study non-isothermal DSC thermograms were recorded at different heating rates ( $\beta$ ) of 10, 20, 30 and 40 K/min for all glasses in bulk form under  $N_2$  atmosphere.

**Table S1: Glass-transition ( $T_g$ , °C), first onset crystallization ( $T_{x1}$ , °C), first crystallization peak ( $T_{p1}$ , °C), melting ( $T_m$ , °C), glass thermal stability ( $\Delta T$ , °C) of LGTT-Ce2, LGTT-Pr2, LGTT-Nd2, LGTT-Sm2, LGTT-Eu2, LGTT-Tb2 and LGTT-Dy2 glasses.**

| Glass Name      | $T_g$ | $T_{x1}$ | $T_{p1}$ | $T_m$ | $\Delta T$ |
|-----------------|-------|----------|----------|-------|------------|
| <b>LGTT-Ce2</b> | 417   | 457      | 482      | 759   | 40         |
| <b>LGTT-Pr2</b> | 436   | 476      | 495      | 766   | 40         |
| <b>LGTT-Nd2</b> | 433   | 482      | 510      | 768   | 49         |
| <b>LGTT-Sm2</b> | 434   | 474      | 494      | 771   | 40         |
| <b>LGTT-Eu2</b> | 432   | 475      | 500      | 772   | 43         |
| <b>LGTT-Tb2</b> | 435   | 480      | 495      | 771   | 45         |
| <b>LGTT-Dy2</b> | 431   | 472      | 492      | 770   | 41         |

**Table S2: Result of the Rietveld refinements of different RE doped LGTT GCs.**

| Sample                  | $(La/Ce\ Gd)_2Te_6O_{15}$ |                  | $(La/Pr\ Gd)_2Te_6O_{15}$ |                  |
|-------------------------|---------------------------|------------------|---------------------------|------------------|
|                         | $(La/Ce)_2Te_6O_{15}$     | $Gd_2Te_6O_{15}$ | $(La/Pr)_2Te_6O_{15}$     | $Gd_2Te_6O_{15}$ |
| <b>Chemical formula</b> |                           |                  |                           |                  |
| <b>Temperature</b>      | 298 K                     | 298 K            | 298 K                     | 298 K            |
| <b>Wavelength</b>       | 1.5458 Å                  | 1.5458 Å         | 1.5458 Å                  | 1.5458 Å         |
| <b>Crystal system</b>   | Cubic                     | Cubic            | Cubic                     | Cubic            |
| <b>Space group</b>      | $Fm\bar{3}m$              | $Fm\bar{3}m$     | $Fm\bar{3}m$              | $Fm\bar{3}m$     |
| <b>GOF</b>              |                           | 1.47             |                           | 1.52             |
| <b>wR</b>               |                           | 13.97%           |                           | 15.12%           |
| <b>Rf<sup>2</sup></b>   | 15.32%                    | 16.36%           | 13.7%                     | 11.54%           |
| <b>RF</b>               | 7.63%                     | 8.56%            | 12.4%                     | 11.12%           |

$R = \frac{\sum ||F_o| - |F_c||}{\sum |F_o|}$ ,  $wR = \left( \frac{\sum [w(|F_o|^2 - |F_c|^2)^2]}{\sum [w(|F_o|^4)]} \right)^{1/2}$  and  $w = 1/(\sigma^2 (I) + 0.0004I^2)$



| Sample           | (La/Nd Gd) <sub>2</sub> Te <sub>6</sub> O <sub>15</sub> |                                                 | (La Gd/Sm) <sub>2</sub> Te <sub>6</sub> O <sub>15</sub> |                                                      |
|------------------|---------------------------------------------------------|-------------------------------------------------|---------------------------------------------------------|------------------------------------------------------|
| Chemical formula | (La/Nd) <sub>2</sub> Te <sub>6</sub> O <sub>15</sub>    | Gd <sub>2</sub> Te <sub>6</sub> O <sub>15</sub> | La <sub>2</sub> Te <sub>6</sub> O <sub>15</sub>         | (Gd/Tb) <sub>2</sub> Te <sub>6</sub> O <sub>15</sub> |
| Temperature      | 298 K                                                   | 298 K                                           | 298 K                                                   | 298 K                                                |
| Wavelength       | 1.5458 Å                                                | 1.5458 Å                                        | 1.5458 Å                                                | 1.5458 Å                                             |
| Crystal system   | Cubic                                                   | Cubic                                           | Cubic                                                   | Cubic                                                |
| Space group      | Fm $\bar{3}$ m                                          | Fm $\bar{3}$ m                                  | Fm $\bar{3}$ m                                          | Fm $\bar{3}$ m                                       |
| GOF              |                                                         | 1.38                                            |                                                         | 1.62                                                 |
| wR               |                                                         | 10.07%                                          |                                                         | 11.56%                                               |
| Rf <sup>2</sup>  | 10.52%                                                  | 11.54%                                          | 9.89%                                                   | 10.25%                                               |
| RF               | 13.02%                                                  | 11.12%                                          | 10.58%                                                  | 10.49%                                               |

$$R = \frac{\sum ||F_o| - |F_c||}{\sum |F_o|}, wR = \frac{(\sum [w(|F_o|^2 - |F_c|^2)^2])^{1/2}}{\sum [w(|F_o|^4)]^{1/2}} \text{ and } w = 1/(\sigma^2 (I) + 0.0004I^2)$$

| Sample           | (La Gd/Tb) <sub>2</sub> Te <sub>6</sub> O <sub>15</sub> |                                                      | (La Gd/Dy) <sub>2</sub> Te <sub>6</sub> O <sub>15</sub> |                                                      |
|------------------|---------------------------------------------------------|------------------------------------------------------|---------------------------------------------------------|------------------------------------------------------|
| Chemical formula | La <sub>2</sub> Te <sub>6</sub> O <sub>15</sub>         | (Gd/Tb) <sub>2</sub> Te <sub>6</sub> O <sub>15</sub> | La <sub>2</sub> Te <sub>6</sub> O <sub>15</sub>         | (Gd/Dy) <sub>2</sub> Te <sub>6</sub> O <sub>15</sub> |
| Temperature      | 298 K                                                   | 298 K                                                | 298 K                                                   | 298 K                                                |
| Wavelength       | 1.5458 Å                                                | 1.5458 Å                                             | 1.5458 Å                                                | 1.5458 Å                                             |
| Crystal system   | Cubic                                                   | Cubic                                                | Cubic                                                   | Cubic                                                |
| Space group      | Fm $\bar{3}$ m                                          | Fm $\bar{3}$ m                                       | Fm $\bar{3}$ m                                          | Fm $\bar{3}$ m                                       |
| GOF              |                                                         | 1.77                                                 |                                                         | 1.77                                                 |
| wR               |                                                         | 14.19%                                               |                                                         | 14.19%                                               |
| Rf <sup>2</sup>  | 11.41%                                                  | 10.25%                                               | 13.89%                                                  | 13.39%                                               |
| RF               | 9.18%                                                   | 10.49%                                               | 12.05%                                                  | 11.25%                                               |

$$R = \frac{\sum ||F_o| - |F_c||}{\sum |F_o|}, wR = \frac{(\sum [w(|F_o|^2 - |F_c|^2)^2])^{1/2}}{\sum [w(|F_o|^4)]^{1/2}} \text{ and } w = 1/(\sigma^2 (I) + 0.0004I^2)$$

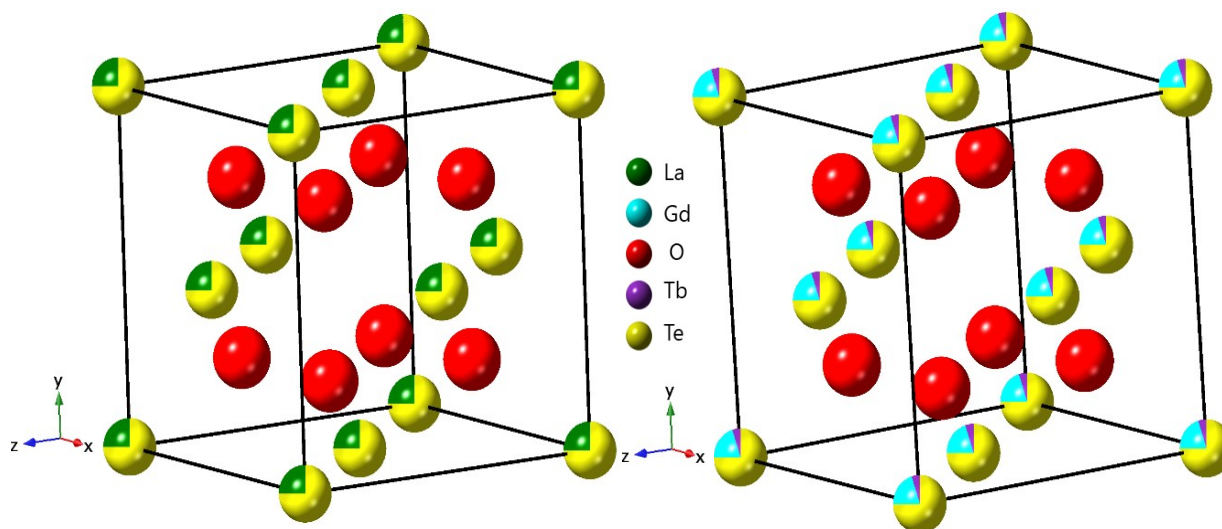

Fig. S5 Representative crystal structure of La<sub>2</sub>Te<sub>6</sub>O<sub>15</sub>, and (Gd/RE)<sub>2</sub>Te<sub>6</sub>O<sub>15</sub> phases.

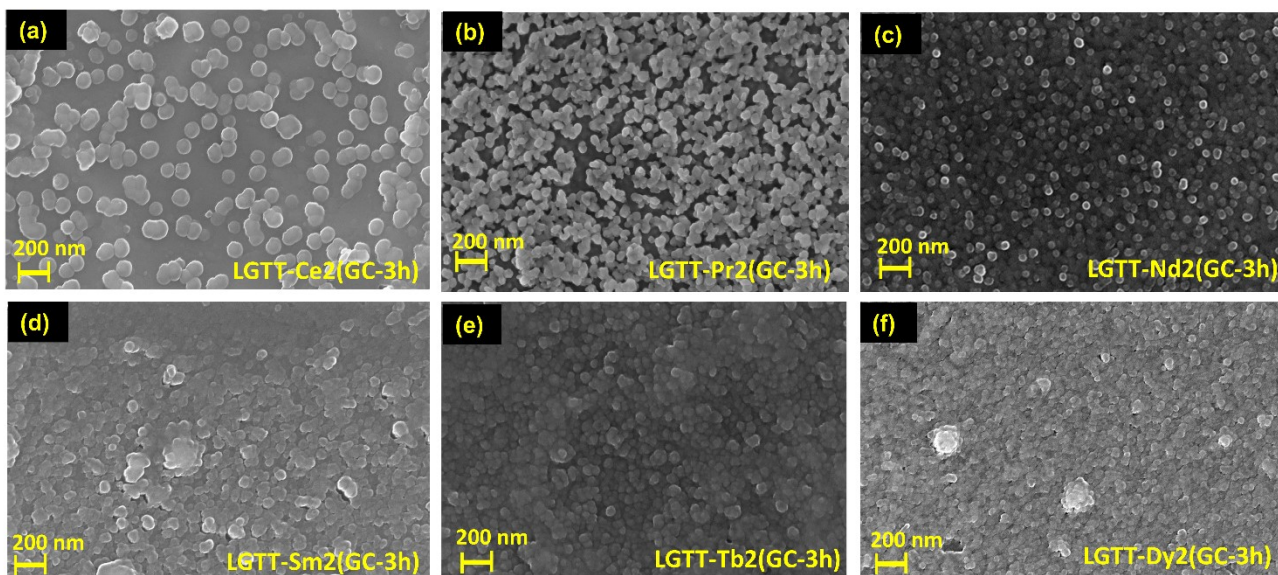

**Fig. S6** FE-SEM images of the 3h heat-treated glass-ceramics (a) LGTT-Ce<sub>2</sub>(GC-3h), (b) LGTT-Pr<sub>2</sub>(GC-3h), (c) LGTT-Nd<sub>2</sub>(GC-3h), (d) LGTT-Sm<sub>2</sub>(GC-3h), (e) LGTT-Tb<sub>2</sub>(GC-3h), (f) LGTT-Dy<sub>2</sub>(GC-3h).

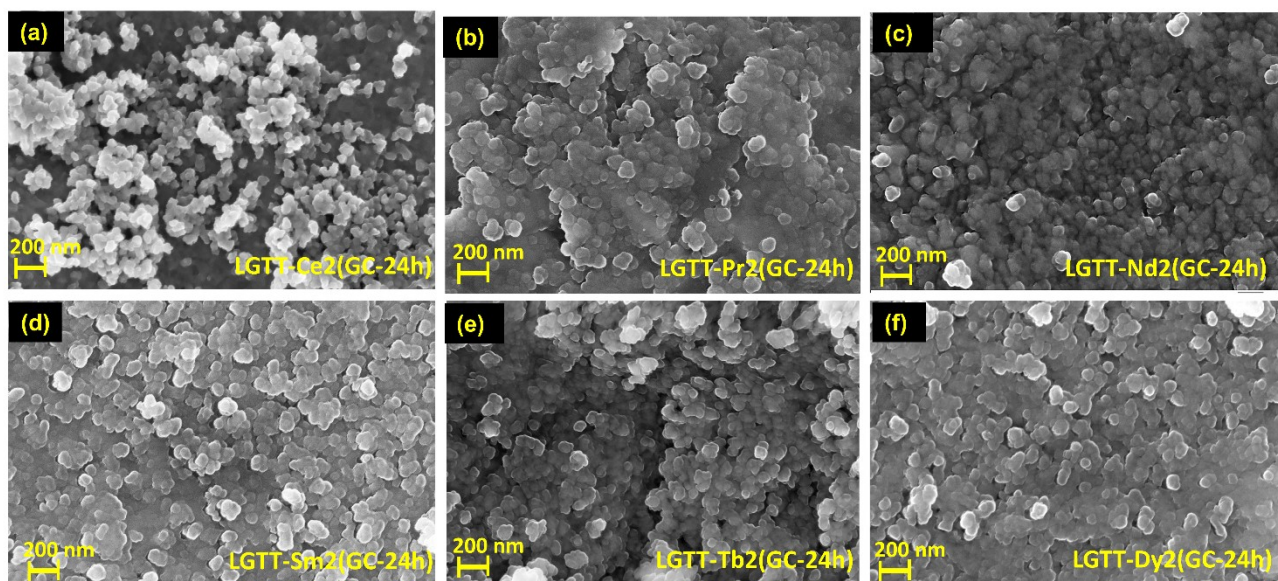

**Fig. S7** FE-SEM images of the 24h heat-treated glass-ceramics (a) LGTT-Ce<sub>2</sub>(GC-24h), (b) LGTT-Pr<sub>2</sub>(GC-24h), (c) LGTT-Nd<sub>2</sub>(GC-24h), (d) LGTT-Sm<sub>2</sub>(GC-24h), (e) LGTT-Tb<sub>2</sub>(GC-24h), (f) LGTT-Dy<sub>2</sub>(GC-24h).



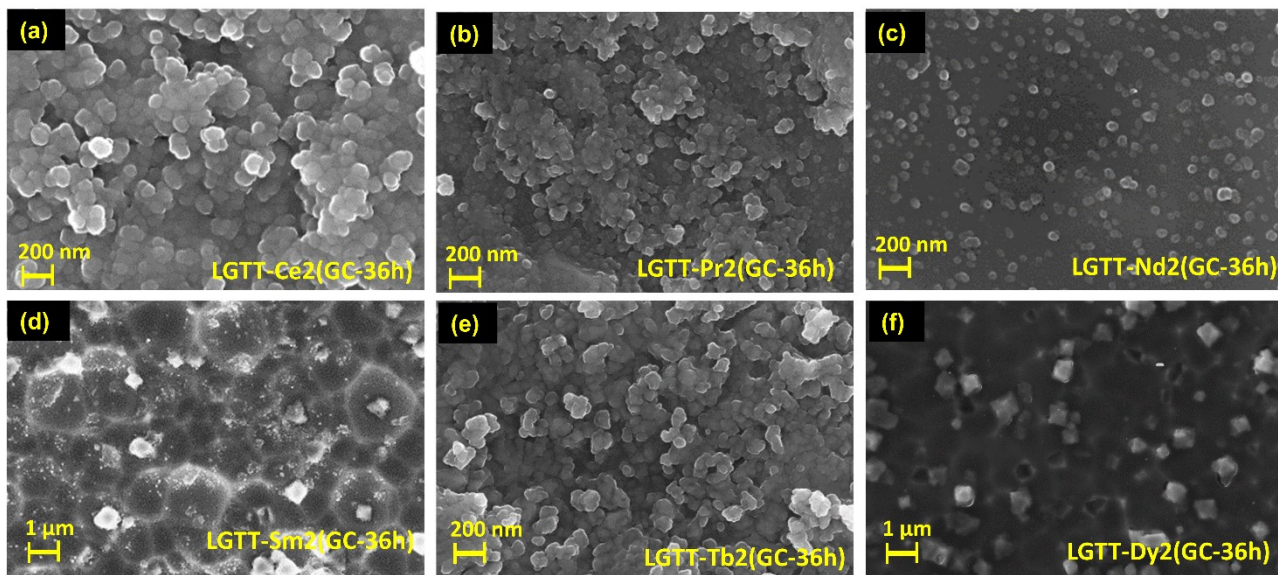

**Fig. S8** FE-SEM images of the 36h heat-treated glass-ceramics after grinding the top surface  $\sim 0.5$  mm: (a) LGTT-Ce<sub>2</sub>(GC-36h), (b) LGTT-Pr<sub>2</sub>(GC-36h), (c) LGTT-Nd<sub>2</sub>(GC-36h), (d) LGTT-Sm<sub>2</sub>(GC-36h), (e) LGTT-Tb<sub>2</sub>(GC-36h), (f) LGTT-Dy<sub>2</sub>(GC-36h).

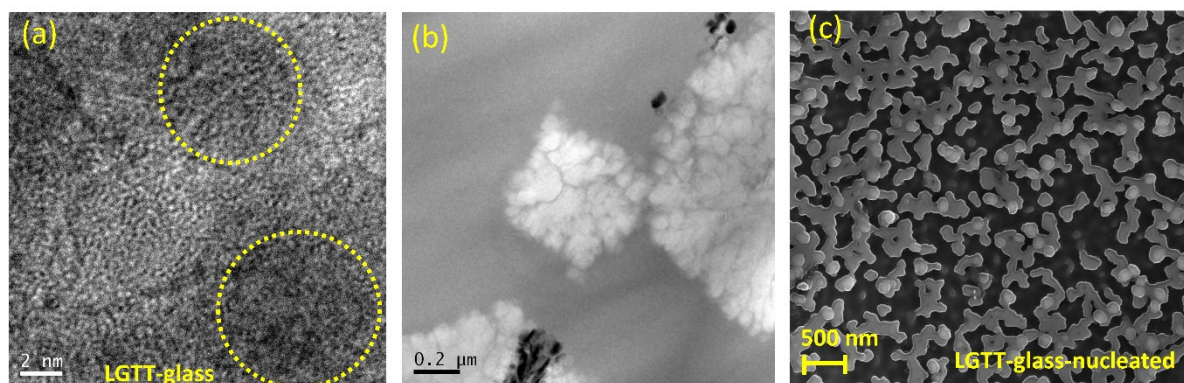

**Fig. S9** (a) HR-TEM image of LGTT-glass (b) BF-TEM image of LGTT-Pr<sub>2</sub>(GC-36h) (c) FE-SEM image of the nucleated LGTT-glass (at 400 °C).



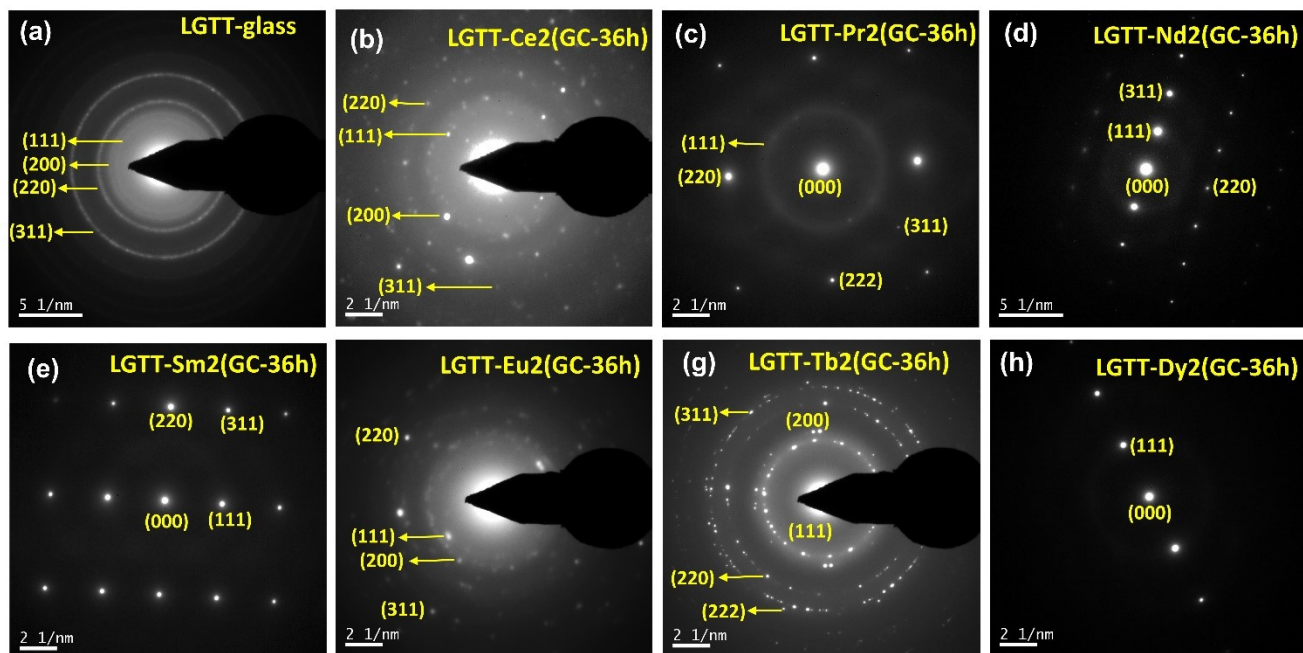

**Fig. 10** SAED-pattern of (a) LGTT-glass, (b) LGTT-Ce<sub>2</sub>(GC-36h), (c) LGTT-Pr<sub>2</sub>(GC-36h), (d) LGTT-Nd<sub>2</sub>(GC-36h), (e) LGTT-Sm<sub>2</sub>(GC-36h), (f) LGTT-Eu<sub>2</sub>(GC-36h) (g) LGTT-Tb<sub>2</sub>(GC-36h) (h) LGTT-Dy<sub>2</sub>(GC-36h).
